# Supplementary material for: Systematic Investigation of Initiatives to Reduce Seclusion and Restraint in a State Psychiatric Hospital
Source: Atypon-hosted journal article supplement (doi:10.1176/ps.62.5.pss6205_0477), 2011-05-01
Supplement: Borckardt_DS.pdf [file Borckardt_DS.pdf]

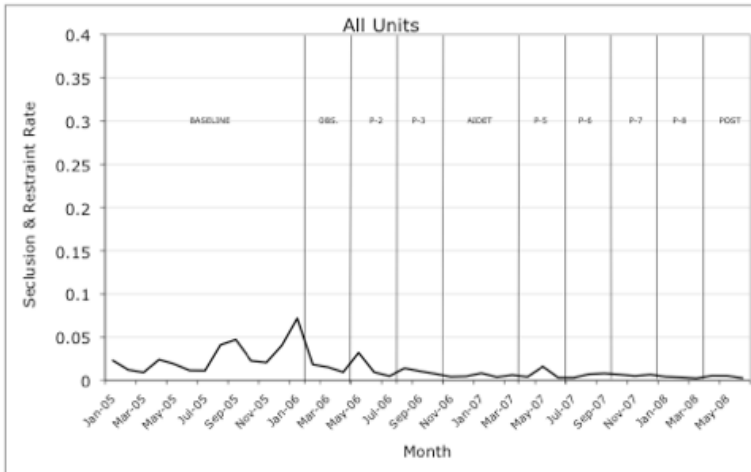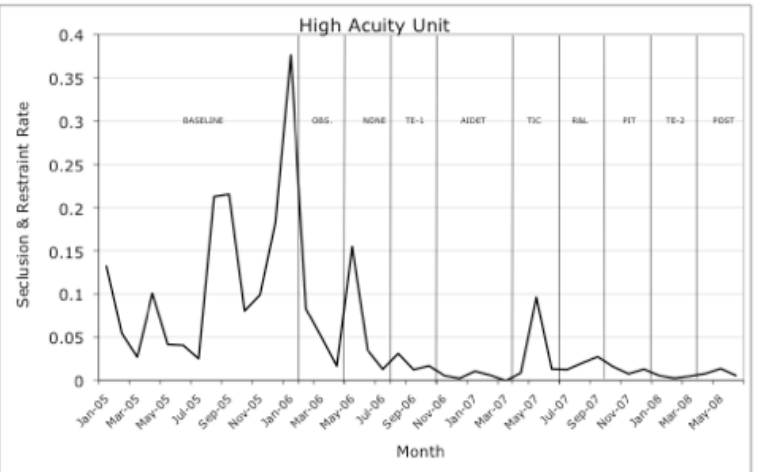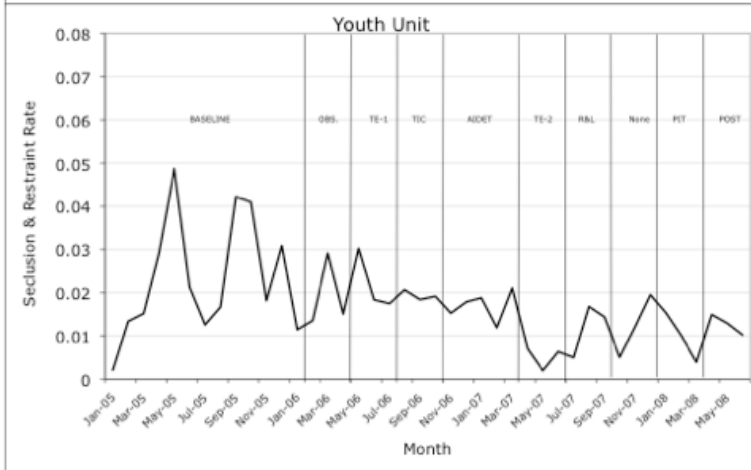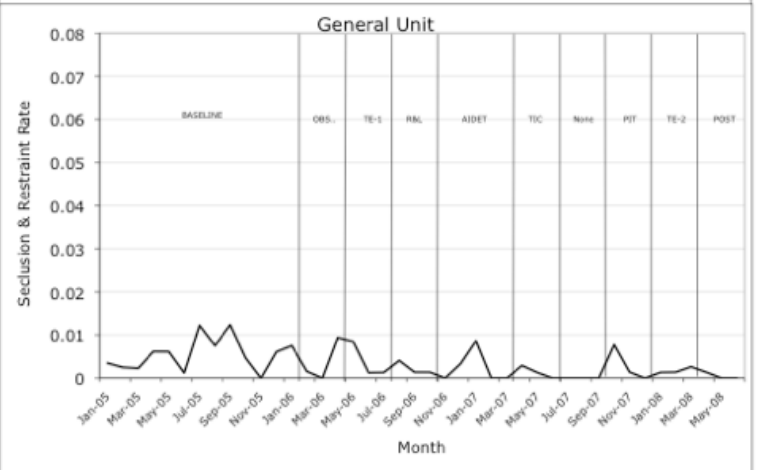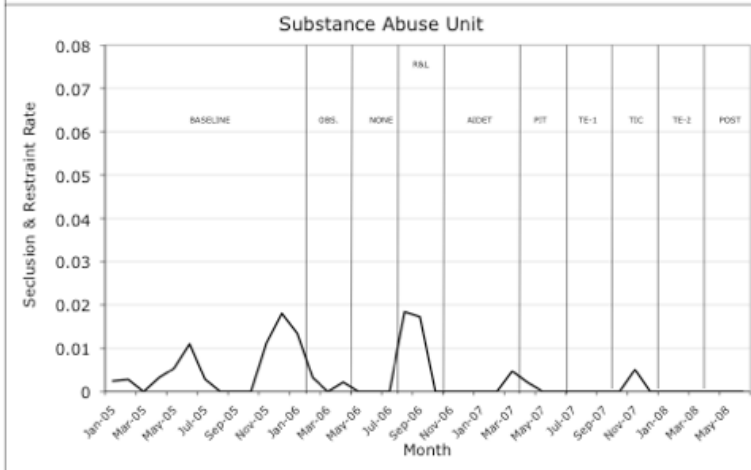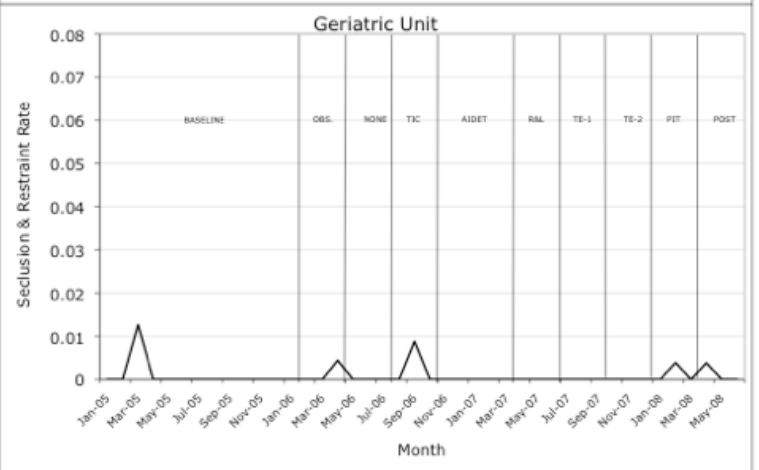

| Unit            | Phase-0<br>4/05-6/06 | Phase-1<br>6/06-5/06 | Phase-2<br>6/06-7/06 | Phase-3<br>8/06-10/06 | Phase-4<br>11/06-3/07 | Phase-5<br>4/07-6/07 | Phase-6<br>7/07-8/07 | Phase-7<br>10/07-12/07 | Phase-8<br>1/08-3/08 | Phase-9<br>6/08-8/08 |
|-----------------|----------------------|----------------------|----------------------|-----------------------|-----------------------|----------------------|----------------------|------------------------|----------------------|----------------------|
| High Acuity     | Baseline             | Observation          | None                 | TE-1                  | AIDET                 | TIC                  | RBL                  | PIT                    | TE-2                 | POST                 |
| Geriatric       | Baseline             | Observation          | None                 | TIC                   | AIDET                 | RBL                  | TE-1                 | TE-2                   | PIT                  | POST                 |
| General         | Baseline             | Observation          | TE-1                 | RBL                   | AIDET                 | TIC                  | None                 | PIT                    | TE-2                 | POST                 |
| Substance Abuse | Baseline             | Observation          | None                 | RBL                   | AIDET                 | PIT                  | TE-1                 | TIC                    | TE-2                 | POST                 |
| Youth           | Baseline             | Observation          | TE-1                 | TIC                   | AIDET                 | TE-2                 | RBL                  | PIT                    | PIT                  | POST                 |

  

|             |                                            |       |                                                          |
|-------------|--------------------------------------------|-------|----------------------------------------------------------|
| Observation | : Engagement Consultation and Grand Rounds | TIC   | : Trauma-Informed Care Intervention                      |
| TE-1        | : 1st Therapeutic Environment Intervention | PIT   | : Patient Involvement in Treatment Planning Intervention |
| TE-2        | : 2nd Therapeutic Environment Intervention | AIDET | : Organization Customer Service Initiative               |
| RBL         | : Rules and Language Intervention          | POST  | : Follow-up Period                                       |
